# Supplementary material for: Correlations between Negative Symptoms and Cognitive Deficits in Individuals at First Psychotic Episode or at High Risk of Psychosis: A Systematic Review
Source: MDPI journal article supplement (doi:10.3390/jcm12227095), 2023-11-14
Supplement: s1 [file s1]

## Supplementary materials

**Table S1. Details of the included studies on First Psychotic Episode**

| Author(s),<br>Year, study<br>design                | Sample size/<br>Number of Included<br>Studies and<br>Characteristics of<br>included subjects                                                                            | Pharmacological treatment                                                                                                                                                                                                                                                                                                                                                                                        | Negative<br>symptom<br>assessment | Cognitive deficit<br>assessment                                                                                                               | Results                                                                                                                                                                                                                                                                                                                                                                                                                                                                                                                                                                                                                                                                                                                                                                                                                                                                                                                                                                                                                           | Study Quality |
|----------------------------------------------------|-------------------------------------------------------------------------------------------------------------------------------------------------------------------------|------------------------------------------------------------------------------------------------------------------------------------------------------------------------------------------------------------------------------------------------------------------------------------------------------------------------------------------------------------------------------------------------------------------|-----------------------------------|-----------------------------------------------------------------------------------------------------------------------------------------------|-----------------------------------------------------------------------------------------------------------------------------------------------------------------------------------------------------------------------------------------------------------------------------------------------------------------------------------------------------------------------------------------------------------------------------------------------------------------------------------------------------------------------------------------------------------------------------------------------------------------------------------------------------------------------------------------------------------------------------------------------------------------------------------------------------------------------------------------------------------------------------------------------------------------------------------------------------------------------------------------------------------------------------------|---------------|
| Bliksted et<br>al. 2017<br><br>Cross-<br>sectional | FES=59<br>Mean Age=22.9y;<br>Gender (n. males)=<br>36;<br>Mean education<br>=12.1y; Mean age at<br>onset=N/A<br>DUP=N/A<br>days of FES-<br>diagnosis=129.1;<br>DUI=9.5y | SGA=29;<br>SGA(+antidepressant)=13;<br>SGA(+other medications)=4;<br>FGA(+other medication)=1;<br>SGA(+antidepressant+BZD)=1<br>Antipsychotic-naïve=9<br><br>Mean CPZe=N/A<br><br>Duration of treatment:<br>patients enrolled between<br>2009-2010 (n=36): less than<br>3m of treatment<br>patients enrolled between<br>2011-2012 (n=23): less than<br>6w of treatment during lifetime<br>or antipsychotic-naïve | SANS, excluding<br>attention      | - Neurocognitive<br>deficits: BACS<br>composite score;<br><br>IQ: WAIS III<br><br>- Social perception:<br>TASIT;<br><br>- Theory of mind: ATT | Blunted affect and alogia correlated negatively with<br>ToM (r -0.30, p ≤ 0.05, r -0.32, p ≤ 0.01,<br>respectively), overall social cognition (r=-0.29, p ≤<br>0.05, r=-0.28 , p ≤ 0.05, respectively) and IQ<br>(r=0.33, p= 0.01, r=-0.44, p≤0.001, repectively).<br><br>Alogia but not blunted affect correlated negatively<br>with social perception (r -0.32, p ≤ 0.01)<br>Avolition-apathy correlated negatively with<br>neurocognitive composite score (r -0.30, p ≤ 0.05);<br>Anhedonia-asociality correlated negatively with<br>social perception, neurocognition, IQ and social<br>cognitive composite score (r=-0.32, p ≤ 0.01, r=-<br>0.38, p ≤ 0.05, r=-0.36, p<0.01 r=-0.39, p≤ 0.01,<br>respectively).<br><br>Subgroup analysis revealed that patients with high<br>NS had more severe neurocognitive and social<br>cognitive deficits compared to other groups; patients<br>with high positive symptoms but low NS had better<br>neurocognitive and social cognitive performances<br>compared to all other groups. | Average       |
| Buck et al.<br>2020<br><br>Cross-<br>sectional     | FEP= 276<br>(SCZ=182; SCZ-<br>A=37; DD= 9;<br>BPD=1; Psychosis<br>NOS=47);<br><br>Demographic<br>variables were<br>reported separately                                  | FGA/SGA=N/A<br><br>Mean CPZe:<br>M= 170.23<br>F=148.79<br><br>Duration of treatment: no past<br>antipsychotic medication ><br>1month                                                                                                                                                                                                                                                                             | SANS, excluding<br>attention      | - Neurocognition:<br>WMS-III or CogState<br>Research Battery<br>depending on<br>recruitment date<br>(before and after 2010<br>respectively)   | The serial mediation model analysis showed male<br>sex was correlated with worse Verbal working<br>memory, which predicted more negative symptoms<br>which predicted worse functioning (β=0.67,<br>SE=0.38, 95% CI=[1.00, 1.57]).                                                                                                                                                                                                                                                                                                                                                                                                                                                                                                                                                                                                                                                                                                                                                                                                 | Good          |

|                                                                  |                                                                                                                                                                                                                                                                   |            |                                                                                                            |                                                                                                                                                                                      |                                                                                                                                                                                                                                                                                                                                                                                                                                                                                                                                                                                                                                                                                                                                                                                                                                                                                                                                               |         |
|------------------------------------------------------------------|-------------------------------------------------------------------------------------------------------------------------------------------------------------------------------------------------------------------------------------------------------------------|------------|------------------------------------------------------------------------------------------------------------|--------------------------------------------------------------------------------------------------------------------------------------------------------------------------------------|-----------------------------------------------------------------------------------------------------------------------------------------------------------------------------------------------------------------------------------------------------------------------------------------------------------------------------------------------------------------------------------------------------------------------------------------------------------------------------------------------------------------------------------------------------------------------------------------------------------------------------------------------------------------------------------------------------------------------------------------------------------------------------------------------------------------------------------------------------------------------------------------------------------------------------------------------|---------|
|                                                                  | <p>for male and female subjects:</p> <p>Males=201<br/>Mean Age=22y;<br/>Mean education=11.73y; Mean age at onset=21.92y.<br/>DUP=N/A</p> <p>Females= 75<br/>Mean age= 23.16y;<br/>Mean education=12.25y;<br/>Mean age at onset=22.36y<br/>DUP=N/A<br/>DUI=N/A</p> |            |                                                                                                            |                                                                                                                                                                                      |                                                                                                                                                                                                                                                                                                                                                                                                                                                                                                                                                                                                                                                                                                                                                                                                                                                                                                                                               |         |
| <p>Chan et al. 2006</p> <p>Cross-sectional</p>                   | <p>FES=78<br/>Mean age=28.5;<br/>Gender (n. males)=49 M;<br/>Mean education=10.5y<br/>Mean age at onset=N/A<br/>DUP=248.6d<br/>DUI=N/A</p>                                                                                                                        | Drug-naive | PANSS negative subscale<br>SANS                                                                            | <p>-Sustained attention: CPT, SART, MCT</p> <p>-executive functions: LNS, MWCST, VPT, TMT-B, HSCT-B, SET, Stroop test</p> <p>-Reasoning and problem solving: Tower of Hanoi Test</p> | <p>Initiation components were found to be associated with PANSS negative symptom (<math>r = 0.34</math>, <math>p = 0.0004</math>) and SANS global alogia (<math>r = 0.3</math>, <math>p = 0.01</math>), but also with memory impairment and global IQ. Sustained attention component was also significantly correlated with PANSS negative symptoms (<math>r = -0.34</math>, <math>p = 0.003</math>), and SANS global alogia (<math>r = -0.29</math>, <math>p = 0.01</math>) but also general psychopathology and IQ. Online updating component was associated with PANSS negative symptoms (<math>r = -0.27</math>, <math>p = 0.02</math>) but also with memory impairment and IQ. Switching and flexibility component was related to PANSS negative symptoms (<math>r = 0.25</math>, <math>p = 0.04</math>) and SANS global affective flattening (<math>r = 0.25</math>, <math>p = 0.04</math>) but also with memory impairment and IQ.</p> | Good    |
| <p>Chang et al. 2014</p> <p>Longitudinal and cross-sectional</p> | <p>FEP-SSD=93 (SCZ=75; Schizophreniform=13 SCZ-A=5);<br/>Mean age=31.2;<br/>Gender (n. males)=42 M;<br/>Mean education=10.4y<br/>Mean age at onset=N/A</p>                                                                                                        | N/A        | High Royds Evaluation of Negativity Scale (HEN): EXP score comprises Affect, Behavior and Speech subscales | <p>-Logical memory test: WMS-R</p> <p>-Visual learning and memory: WMS-R</p> <p>- Processing speed: DSF</p> <p>- Executive functions: MWCST</p>                                      | <p>EXP was found to correlate with cognitive deficits and particularly with EF concurrently at different time points but not in longitudinal analyses.</p> <p><u>Cross-sectional relationships:</u><br/>EXP was significantly associated with verbal fluency at 12 months and 24 months (<math>r = -0.32</math>, <math>p &lt; .0083</math>, <math>r = -0.33</math>, <math>p &lt; .0083</math> respectively), but not at 36 months.<br/>EXP was significantly associated with visual learning and memory at 24 and 36 months (<math>r = -0.34</math>,</p>                                                                                                                                                                                                                                                                                                                                                                                      | Average |

|                                                 |                                                                                                                                                                                                                                                                                                                                                                                                                                                                                                                           |                                                                                                                                                        |                                                                                                            |                                                                                                                                                                                 |                                                                                                                                                                                                                                                                                                                                                                                                                                                                                                                                                                                     |      |
|-------------------------------------------------|---------------------------------------------------------------------------------------------------------------------------------------------------------------------------------------------------------------------------------------------------------------------------------------------------------------------------------------------------------------------------------------------------------------------------------------------------------------------------------------------------------------------------|--------------------------------------------------------------------------------------------------------------------------------------------------------|------------------------------------------------------------------------------------------------------------|---------------------------------------------------------------------------------------------------------------------------------------------------------------------------------|-------------------------------------------------------------------------------------------------------------------------------------------------------------------------------------------------------------------------------------------------------------------------------------------------------------------------------------------------------------------------------------------------------------------------------------------------------------------------------------------------------------------------------------------------------------------------------------|------|
|                                                 | DUP=473d<br>DUI=N/A                                                                                                                                                                                                                                                                                                                                                                                                                                                                                                       |                                                                                                                                                        |                                                                                                            | -Category verbal fluency                                                                                                                                                        | <p><math>p &lt; 0.0083</math>, <math>r = -0.40</math>, <math>p &lt; 0.0083</math>) but not at 12 months and executive functions;<br/>EXP was significantly related to executive functions at 24 and 36 months (<math>r = -0.36</math>, <math>p \leq 0.05</math>, <math>r = -0.29</math>, <math>p &lt; 0.0083</math>) but not at 12 months.</p> <p><u>Longitudinal relationships:</u><br/>No cross-lagged associations between EXP and cognition were found. No significant correlations between changes in EXP severity and cognitive impairment were observed over three years</p> |      |
| <p>Chang et al. 2016</p> <p>Cross-sectional</p> | <p>FEP = 355 (SSD = 36; BPD=4; DD=10; Psychosis NOS=2):</p> <p>FEP with Primary NS (FEP-PNS, score &gt;3 in at least one of the four SANS subscales but excluding depression, Parkinsonism and positive symptoms) = 52<br/>Mean Age=38y; Gender (n. males )= 14; Mean education =10.29y; Mean age at onset=36.2y<br/>Log DUP=1.95<br/>DUI=N/A</p> <p>FEP without Primary NS (FEP-noPNS) = 303<br/>Mean Age=38.3y; Gender (n. males )= 127; Mean education =10.7y; Mean age at onset=36.6<br/>Log DUP=1.95<br/>DUI=N/A</p> | <p>SGA:<br/>FEP-PNS =38<br/>FEP-noPNS =217</p> <p>Mean CPZe:<br/>FEP-PNS = 190.42<br/>FEP_noPNS = 168.14</p> <p>Mean duration of treatment: 119.7d</p> | <p>SANS, excluding attention subscale, “inappropriate affect” and “poverty of content of speech” items</p> | <p>- Working memory: DSF and DSC of WAIS-R;</p> <p>- Visual Learning and Memory: WMS-R Logical memory and visual reproduction subtests;</p> <p>- Executive functions: MWCST</p> | <p>There was a significant between-group difference in cognitive functions:<br/>FEP-PNS exhibited poorer working memory (<math>f = 6.62</math>, <math>p \leq 0.01</math>) and executive functions than FEP_noPNS (<math>f = 6.62</math>, <math>p \leq 0.01</math>); no differences were found between PNS and no PNS in logical memory and visual reproduction performance.</p> <p>Premorbid social functioning and working memory were independently associated with PNS status.</p>                                                                                               | Good |

|                    |                                                                                                                                                                                                                           |                                                                                                                 |                                                                                                                                                                                                                                          |                                                                                                  |                                                                                                                                                                                                                                                                                                         |      |
|--------------------|---------------------------------------------------------------------------------------------------------------------------------------------------------------------------------------------------------------------------|-----------------------------------------------------------------------------------------------------------------|------------------------------------------------------------------------------------------------------------------------------------------------------------------------------------------------------------------------------------------|--------------------------------------------------------------------------------------------------|---------------------------------------------------------------------------------------------------------------------------------------------------------------------------------------------------------------------------------------------------------------------------------------------------------|------|
| Chang et al. 2017  | FEP = 321<br>CB-SCID-I/P (DSM IV) and IRAOS (SSD=201; Other non-affective psychoses=120); Mean Age=38.3y; Gender (n. males)= 141; Mean education =10.8y; Mean age at onset=36.5y; DUP=531.7d<br>DUI=N/A                   | FGA/SGA=N/A<br><br>Mean duration of treatment=119.7d<br><br>Mean CPZe=N/A<br><br>Mean duration of treatment=N/A | SANS negative domains:<br>Motivational Deficit was composed by the Avolition-apathy and Anhedonia-asociality subscales; Expressive Deficit was composed by Blunted Affect subscale and the poverty of speech item of the Alogia subscale | - Working memory:WAIS-R DSF/DSB and DSC;<br><br>-Executive Functions: MWCST                      | Working memory, executive functions and verbal fluency did not correlate with Expressive Deficit and Motivational Deficit as evaluated with the SANS<br><br>The relationship between neurocognition and functioning was partially mediated by amotivation (indirect effect: $\beta=0.11$ , $p<0.001$ ). | Good |
| Chang et al. 2020a | FEP= 323 CB-SCID-I/P (DSM-IV) : (SCZ = 144; SCZ-phreniform= 58; SCZ-A= 3; BPD= 40 DD= 60 ;PD-nos= 18)<br>Mean age= 38y; Gender (n. males)= 140; mean education= 10.9y<br>Mean age at onset=36.3<br>DUP= 536.7d<br>DUI=N/A | FGA/SGA=N/A<br><br>SGA medication= 229<br><br>Mean CPZe = 168.5<br><br>Mean duration of treatment=N/A           | SANS negative domains:<br>Motivational Deficit was composed by the Avolition-apathy and Anhedonia-asociality subscales; Expressive Deficit was composed by Blunted Affect subscale and the poverty of speech item of the Alogia subscale | -Working memory: WAIS-R DSF/DSB<br>- Processing speed: WAIS-R DSC<br><br>- verbal fluency: MWCST | MAP played the most central role and had the strongest associations with other nodes in the constructed network, especially with the role functioning but not with cognition; only PANSS disorganization had a correlation with processing speed.                                                       | Good |
| Ayres et al. 2007  | FEP=179 (SCZ/SCZphreniform disorder=98)<br>mean age=32.2y; Gender (n. males)= 86; Education: less than 5y=22.9%; 5-8y=24.7%; 9-                                                                                           | FGA/SGA=N/A<br><br>FGA=97; SGA=27<br><br>Anticholinergic drugs=50<br><br>Mean CPZe=N/A                          | PANSS Negative subscale                                                                                                                                                                                                                  | Verbal fluency: COWAT;<br>- Verbal working memory: DSF, DSB                                      | Negative symptoms significantly correlated with verbal fluency ( $r=0.402$ , $p<0.001$ ), DSF, ( $r=0.191$ , $p<0.001$ ) and DSB ( $r=0.282$ , $p<0.001$ ) performances.                                                                                                                                | Poor |

|                                                               |                                                                                                                                                                                                                                                                                                                                                                                                                         |                                                                                                                                                                                                                                                                                                          |                                                                                                                                                                                                                            |                                                                                                                                                                                                                                                                                                                                                                                                                                   |                                                                                                                                                                                                                                                                                                                                                                                                                                                                                                                                                                                                                                                                                                        |         |
|---------------------------------------------------------------|-------------------------------------------------------------------------------------------------------------------------------------------------------------------------------------------------------------------------------------------------------------------------------------------------------------------------------------------------------------------------------------------------------------------------|----------------------------------------------------------------------------------------------------------------------------------------------------------------------------------------------------------------------------------------------------------------------------------------------------------|----------------------------------------------------------------------------------------------------------------------------------------------------------------------------------------------------------------------------|-----------------------------------------------------------------------------------------------------------------------------------------------------------------------------------------------------------------------------------------------------------------------------------------------------------------------------------------------------------------------------------------------------------------------------------|--------------------------------------------------------------------------------------------------------------------------------------------------------------------------------------------------------------------------------------------------------------------------------------------------------------------------------------------------------------------------------------------------------------------------------------------------------------------------------------------------------------------------------------------------------------------------------------------------------------------------------------------------------------------------------------------------------|---------|
|                                                               | 11y=32.9%; 12y or more=19.4%;<br>Mean age at onset=N/A<br>DUP=264.7d<br>DUI=2y                                                                                                                                                                                                                                                                                                                                          | Mean duration of treatment=97.8d                                                                                                                                                                                                                                                                         |                                                                                                                                                                                                                            |                                                                                                                                                                                                                                                                                                                                                                                                                                   |                                                                                                                                                                                                                                                                                                                                                                                                                                                                                                                                                                                                                                                                                                        |         |
| Ditlevsen, Simonsen, and Bliksted 2020<br><br>Cross-sectional | FES=89<br>mean age=23.6y;<br>Gender (n. males)= 35;<br>mean education=12.9y<br>Mean age at onset=N/A<br>DUP=N/A<br>DUI=N/A                                                                                                                                                                                                                                                                                              | FGA/SGA=N/A<br><br>Mean duration of treatment=215d                                                                                                                                                                                                                                                       | SANS total score (excluding attention),<br>Motivational Deficit and Expressive Deficit                                                                                                                                     | - Theory of mind: ATT                                                                                                                                                                                                                                                                                                                                                                                                             | ED symptom severity was the best predictor of TOM performance (AIC weight = 0.44) compared to AA symptom severity, AA+DE combined and total SANS score; however, ED only explained 1-2% of the variance in ATT performance.                                                                                                                                                                                                                                                                                                                                                                                                                                                                            | Average |
| Engen et al. 2019<br><br>Longitudinal study                   | FEP-SSD = 87<br>4 groups based on NS severity:<br><br>Sustained NS= 26<br>mean age=26.3y;<br>Gender (n. males) = 22 M; mean education=12.5y;<br>age at onset=23.1y;<br>DUP (Log)=1.7;<br>DUI=N/A<br><br>Transient NS= 23:<br>mean age=26.9y;<br>Gender (n. males)= 8 M; mean education= 12.3y;<br>age at onset=21.9;<br>DUP(Log)=1.9<br>DUI=N/A<br><br>Mild NS= 26<br>mean age=28.1y;<br>Gender (n. males) = 16 M; mean | FGA/SGA=N/A<br><br>Antipsychotic medication (DDD=Defined Daily Dosage):<br>Ssustained NS=1.1<br>Transient NS=0.9<br>Mild NS=0.9<br>No NS=0.7<br><br>Mean CPZe=N/A<br><br>FEP were recruited within the first 52 weeks after start of first adequate treatment (antipsychotic medication/hospitalization) | PANSS negative symptoms as defined by EPA Guidance:<br>N1 (affective flattening), N2 (emotional withdrawal), N3 (poor rapport), N4 (passive/apathetic social withdrawal), N6 (lack of spontaneity and flow of conversation | IQ: WASI<br><br>-Verbal Learning and Memory: CVLT-II (verbal learning and recall); WMS (Logical Memory, immediate and delayed recall)<br><br>-Processing Speed: WAIS- III (Digit Symbol Test) and D-KEFS (Color-Word Interference Test);<br><br>-Attention: Digit Span and Letter Number Sequencing Test;<br><br>-Executive Functions: D-KEFS (Inhibition and Inhibition/Switching subtest from the Color-Word Interference Test; | NS had a significant and large overall effect on cognitive performance in the 4 cognitive domains;<br><br>All NS groups except the NNS performed significantly poorer than HCs on all domains, except MNS for verbal learning and memory;<br><br>The SNS group was outperformed by the NNS group on processing speed and executive functions, and on verbal learning and memory by the MNS and TNS.<br><br>No difference in cognitive course between the NS groups over the 1-year follow-up period was found.<br><br>The cognitive composite score was strongly and negatively correlated with the total level of NS both at baseline ( $r=-0.36$ , $p=.001$ ) and follow up ( $r=-0.32$ , $p=.003$ ) | Good    |

|                                                          |                                                                                                                                                                                                            |                                                                                                                        |                                                                                                                            |                                                                                                                                                                                                                                                                                                                                                                                                                                                                                                                       |                                                                                                                                                                                                                                                                                                                                                                                                                                                                                                                                                                                                                                                 |         |
|----------------------------------------------------------|------------------------------------------------------------------------------------------------------------------------------------------------------------------------------------------------------------|------------------------------------------------------------------------------------------------------------------------|----------------------------------------------------------------------------------------------------------------------------|-----------------------------------------------------------------------------------------------------------------------------------------------------------------------------------------------------------------------------------------------------------------------------------------------------------------------------------------------------------------------------------------------------------------------------------------------------------------------------------------------------------------------|-------------------------------------------------------------------------------------------------------------------------------------------------------------------------------------------------------------------------------------------------------------------------------------------------------------------------------------------------------------------------------------------------------------------------------------------------------------------------------------------------------------------------------------------------------------------------------------------------------------------------------------------------|---------|
|                                                          | <p>education= 12.4y;<br/>age at onset=24.7y;<br/>DUP(Log)=1.5;<br/>DUI=N/A</p> <p>No NS= 12<br/>mean age=27y; 6 M;<br/>mean education= 11.8y;<br/>age at onset=24y;<br/>DUP(Log)=1.6<br/>DUI=N/A</p>       |                                                                                                                        |                                                                                                                            | - Verbal Fluency:<br>Letter Fluency,<br>Category Fluency and<br>Category Switching<br>from the Verbal<br>Fluency test                                                                                                                                                                                                                                                                                                                                                                                                 |                                                                                                                                                                                                                                                                                                                                                                                                                                                                                                                                                                                                                                                 |         |
| <p>Hegde et al.<br/>2013</p> <p>Cross-<br/>sectional</p> | <p>FES=49 (Paranoid<br/>SCZ=44;<br/>Undifferentiated<br/>SCZ=5);<br/>mean age=29.18;<br/>Gender (n. males )= 34;<br/>mean<br/>education=11.9y;<br/>Mean age at<br/>onset=N/A<br/>DUP=N/A<br/>DUI=12±8m</p> | <p>antipsychotic<br/>medication=100%<br/>(FGA/SGA=N/A)<br/>Mean CPZe=N/A</p> <p>Mean duration of<br/>treatment=N/A</p> | PANSS negative<br>symptoms<br>subscale                                                                                     | <p>-Sustained attention:<br/>Digit Vigilance Test;<br/>-Focused attention:<br/>Color Trails Test;<br/>-Divided attention:<br/>Triads test;<br/>-processing speed:<br/>DSST;<br/>-verbal category<br/>fluency: Animal names<br/>test<br/>-verbal working<br/>memory: Verbal N-<br/>back-task</p> <p>- Executive functions:<br/>planning: Tower of<br/>London,<br/>-concept formation and<br/>set shifting ability:<br/>WCST<br/>-verbal learning and<br/>memory: RAVLT;<br/>-Visual learning and<br/>memory: ROCFT</p> | <p>Negative symptoms scores correlated significantly<br/>with sustained attention (<math>r = 0.31</math>, <math>p &lt; 0.05</math>), verbal<br/>working memory (<math>r = -0.29</math>, <math>p &lt; 0.05</math>), planning<br/>(<math>r = 0.29</math>, <math>p &lt; 0.05</math>), concept formation and set shifting<br/>ability (<math>r = -0.29</math>, <math>p &lt; 0.05</math>) and verbal learning and<br/>memory (<math>r = -0.38</math>, <math>p &lt; 0.01</math>).</p> <p>Negative symptoms did not correlate with focused<br/>attention, divided attention, processing speed, verbal<br/>fluency, and visual learning and memory.</p> | Poor    |
| <p>Huang et al.<br/>2016</p> <p>Cross-<br/>sectional</p> | <p>FES=92<br/>mean age=22.8y;<br/>Gender (n. males )= 36;<br/>mean<br/>education=10.7y</p>                                                                                                                 | drug-naïve                                                                                                             | <p>PANSS negative<br/>factor</p> <p>N1 Affective<br/>flattening, N2<br/>Emotional<br/>Withdrawal, N3<br/>Poor Rapport,</p> | <p>- Executive functions:<br/>WCST</p> <p>- Cognitive flexibility:<br/>SCWT</p>                                                                                                                                                                                                                                                                                                                                                                                                                                       | The negative factor scores were negatively<br>correlated with EF tasks scores ( $r = 0.272 - 0.381$ , $p < 0.01$ ), A/V scores ( $r = 0.230$ , $p < 0.05$ ), processing<br>speed ( $r = 0.293 - 0.306$ , $p < 0.01$ ), and cognitive<br>flexibility ( $r = 0.331 - 0.409$ , $p < 0.01$ ),                                                                                                                                                                                                                                                                                                                                                       | Average |

|                                                 |                                                                                                                                                                                                                               |                                                                                            |                                                                                                                                                                                                                                      |                                                                                                                                         |                                                                                                                                                                                                                                                                                                                                                                                                                                                                                                                                                                                                                                                                                                         |      |
|-------------------------------------------------|-------------------------------------------------------------------------------------------------------------------------------------------------------------------------------------------------------------------------------|--------------------------------------------------------------------------------------------|--------------------------------------------------------------------------------------------------------------------------------------------------------------------------------------------------------------------------------------|-----------------------------------------------------------------------------------------------------------------------------------------|---------------------------------------------------------------------------------------------------------------------------------------------------------------------------------------------------------------------------------------------------------------------------------------------------------------------------------------------------------------------------------------------------------------------------------------------------------------------------------------------------------------------------------------------------------------------------------------------------------------------------------------------------------------------------------------------------------|------|
|                                                 | Mean age at onset=N/A<br>DUP=N/A<br>DUI=12.2m;                                                                                                                                                                                |                                                                                            | N4<br>Passive/Apathetic<br>Social<br>Withdrawal, N6<br>Lack of<br>Spontaneity<br>and Flow of<br>Conversation, G7<br>Motor<br>Retardation, G13<br>Disturbance<br>of Volition,<br>Preoccupation,<br>and G16 Active<br>Social Avoidance | - Attention/Vigilance:<br>CPT;<br><br>- Processing Speed,<br>executive functioning:<br>TMT                                              |                                                                                                                                                                                                                                                                                                                                                                                                                                                                                                                                                                                                                                                                                                         |      |
| Lee et al.<br>2019<br><br>Longitudinal          | FEP = 160:<br>(SCZ=80;DD=19;<br>BPD=33;<br>SCZ-A=1<br>Psychosis nos=27);<br>Mean Age=31.2y;<br>Gender (n. males<br>)=63;<br>mean education=<br>11.6y;<br>Mean age at<br>onset=N/A<br>DUP=90d;<br>DUI=N/A<br>62.5 % inpatients | SGA/FGA=N/A<br><br>CPZe = 338.8 mg/day<br><br>within 1 month of<br>antipsychotic treatment | PANSS negative<br>subscale                                                                                                                                                                                                           | -Working Memory:<br>DSF/DSB, LNS<br><br>-Processing speed:<br>DSC<br><br>-Visual learning and<br>memory: WAIS-R<br>visual patterns test | NS, general psychopathology and insight were<br>significantly associated with cognition and were<br>predictive of functioning;<br>NS, general psychopathology and insight were<br>significant mediators between cognition and<br>functioning.<br><br>The significant direct relationship between cognition<br>and functioning became insignificant after including<br>symptoms and insight in the model. PANSS<br>negative scores significantly correlated with logical<br>memory ( $r=-0.301$ , $p<0.01$ ), working memory<br>DSF/DSB ( $r=-0.233$ , $p<0.05$ ) and LNS scores<br>( $r=-0.296$ , $p<0.01$ ) but not with DSC and visual<br>learning and memory performance ( $r=-0.161$<br>$-0.202$ ). | Good |
| Mazza et al.<br>2012<br><br>cross-<br>sectional | FEP= 49 (SSD=49;<br>within 3 months from<br>initial diagnosis);<br>Mean age= 26.4;<br>Gender (n. males )=<br>33;<br>Mean education=<br>12.6y<br>Mean age at<br>onset=N/A<br>DUP=N/A<br>DUI=N/A                                | N/A                                                                                        | BPRS: item 16,<br>(Affective<br>flattening), 17<br>(emotional<br>withdrawal), 18<br>(Motor<br>retardation)                                                                                                                           | - TOM= TOM<br>advanced task                                                                                                             | Negative symptoms were significantly and<br>negatively correlated with TOM scores ( $r=-.383$ ,<br>$p<0.000$ ).                                                                                                                                                                                                                                                                                                                                                                                                                                                                                                                                                                                         | Poor |

|                                                      |                                                                                                                                                                                                                                                                                                                                                                             |                                                                                                                                                                                                  |                                                                                                       |                                                                                                                                                                                                                                                                  |                                                                                                                                                                                                                                                                                                                                                                             |         |
|------------------------------------------------------|-----------------------------------------------------------------------------------------------------------------------------------------------------------------------------------------------------------------------------------------------------------------------------------------------------------------------------------------------------------------------------|--------------------------------------------------------------------------------------------------------------------------------------------------------------------------------------------------|-------------------------------------------------------------------------------------------------------|------------------------------------------------------------------------------------------------------------------------------------------------------------------------------------------------------------------------------------------------------------------|-----------------------------------------------------------------------------------------------------------------------------------------------------------------------------------------------------------------------------------------------------------------------------------------------------------------------------------------------------------------------------|---------|
| Piskulic and Addington 2011<br><br>Report study      | FEP=50 (SCZ=32; SCZ-phreniform=12; DD=1; Psychotic disorder NOS=3; SCZ-A=1);<br>mean age=25.1y;<br>Gender (n. males)= 15 M<br>Mean education= N/A<br>Mean age at onset=N/A<br>DUP=N/A<br>DUI=N/A                                                                                                                                                                            | N/A                                                                                                                                                                                              | PANSS negative symptoms subscale plus Disturbance of volition (G13) and active social avoidance (G16) | -Facial affect recognition: FEIT, FEDT<br>-Social perception: SCRT<br>-Social knowledge: SFRT                                                                                                                                                                    | Stereotyped thinking (N7) was the only item that made a significant unique contribution to each of the three measures of social cognition; N1, N6, N7 and G16 significantly predicted 20% of the variance in facial affect recognition; N5, N6, N7 explained 33% of the variance in social knowledge; N3, N4, N5, N6, N7 explained 25% of the variance in social perception | Poor    |
| Rodríguez-Sánchez et al. 2008<br><br>Cross-sectional | FEP=126<br>no prior treatment with antipsychotic medication or, if previously treated, a total lifetime of adequate antipsychotic treatment of less than 6 weeks.<br><br>(SCZ=77; SCZphreniform=34; BPD=8; Psychosis NOS=7);<br>Mean age=26.9y;<br>Gender (n. males )= 81;<br>mean education=10.32y;<br>Mean age at onset=N/A<br>DUI=24.6m;<br>DUP=12.13m;<br>Inpatients=82 | FGA=42<br>SGA=84<br><br>Mean CPZe=N/A<br><br>Mean duration of treatment=no prior treatment or, if previously treated, a total life time of adequate antipsychotic treatment of less than 6 weeks | SANS total score                                                                                      | -Attention/ Vigilance: CPT;<br><br>-Verbal learning and memory: RAVLT;<br><br>-Visual learning and memory: Rey complex figure;<br><br>-Executive functions and speed of processing: Visual cancellation test, DSF/DSB, TMT-A, TMT-B<br><br>- Verbal fluency: FAS | TMT-A (r=-0.287, p=0.002)/B (r=-.227; p=0.014), visual cancellation (-0.391; p<0.001) and digit symbol (r=-0.202, p=0.029), correlated with negative symptoms.<br><br>No correlation was found between NS with attention, verbal and visual memory, verbal fluency nor verbal ability.                                                                                      | Average |
| Saleem et al. 2013                                   | FEP= 20 (max 1 episode, diagnosis NOS)<br>Mean age=26.5y;<br>Gender (n. males )=                                                                                                                                                                                                                                                                                            | SGA =17<br>FGA=3<br><br>Mean CPZe=N/A                                                                                                                                                            | PANSS negative subscale                                                                               | CANTAB<br>-Visual learning and memory: PRM;                                                                                                                                                                                                                      | Visual learning and memory (r = -0.56, p < 0.01) and executive functions (r = -0.49, p < 0.05) were significantly and negatively correlated with the severity of negative symptoms. However, there were                                                                                                                                                                     | Poor    |



|                                                  |                                                                                                                                                                                                                                                                                                                            |                           |                         |                                                                                                                                                                                                                                                                                                                                                                                                                                                                                                                   |                                                                                                                                                                                                                                                                                                                                                 |         |
|--------------------------------------------------|----------------------------------------------------------------------------------------------------------------------------------------------------------------------------------------------------------------------------------------------------------------------------------------------------------------------------|---------------------------|-------------------------|-------------------------------------------------------------------------------------------------------------------------------------------------------------------------------------------------------------------------------------------------------------------------------------------------------------------------------------------------------------------------------------------------------------------------------------------------------------------------------------------------------------------|-------------------------------------------------------------------------------------------------------------------------------------------------------------------------------------------------------------------------------------------------------------------------------------------------------------------------------------------------|---------|
| Cross-sectional study                            | 16;<br>mean<br>education=11.9y<br>Mean age at<br>onset=N/A<br>DUP=N/A<br>DUI=N/A                                                                                                                                                                                                                                           | duration of treatment=N/A |                         | -Visual learning and<br>memory: SRM;<br><br>-Executive functions:<br>IED;<br><br>-Working memory:<br>SOC;<br><br>-Attention: CRT                                                                                                                                                                                                                                                                                                                                                                                  | no significant correlations with working memory or attention.                                                                                                                                                                                                                                                                                   |         |
| Stouten et al. 2017<br><br>cross-sectional study | FEP=162<br>(enrollment within<br>the first three months<br>from first contact)<br>(SCZ=81<br>SCZ-aff=9<br>BPD=9<br>DD=5<br>shared psychotic<br>disorder=2<br>psychotic disorder<br>NOS=56)<br>Mean age=27.61y;<br>Gender (n. males )=<br>116;<br>mean<br>education=11.9y<br>Mean age at<br>onset=N/A<br>DUP=N/A<br>DUI=N/A | N/A                       | PANSS negative subscale | -Cognitive biases:<br>DACOBS<br><br>-Emotion processing:<br>ANT<br>-Theory of mind:<br>Hinting task<br>-Social knowledge:<br>WAIS-III picture<br>arrangement<br><br>- Processing speed:<br>TMT-A<br><br>- Working memory:<br>WAIS III LNS<br>- Verbal learning and<br>memory: RAVLT<br><br>- Attention: CPT<br><br>- Verbal fluency:<br>Category fluency task<br><br>- Problem solving:<br>Tower of London,<br>WAIS III block design<br>subset<br><br>- Working memory:<br>WAIS III LNS<br><br>- Visual learning: | Negative symptoms were significantly correlated with ‘verbal processing speed’, a factor composed of processing speed, attention, verbal learning and memory and verbal fluency tests ( $r=-0.353$ , $P \leq 0.001$ .) but not with a ‘general neurocognition’ factor (problem solving, working memory, planning), nor social cognition scores. | Average |

|                                                             |                                                                                                                                                                                                                   |                                                                                                                                                                                                                                       |                                                                     | BVMT                                                                                                                                                                                                                                                                                                                                      |                                                                                                                                                                                                                                                                                                                                                                               |      |
|-------------------------------------------------------------|-------------------------------------------------------------------------------------------------------------------------------------------------------------------------------------------------------------------|---------------------------------------------------------------------------------------------------------------------------------------------------------------------------------------------------------------------------------------|---------------------------------------------------------------------|-------------------------------------------------------------------------------------------------------------------------------------------------------------------------------------------------------------------------------------------------------------------------------------------------------------------------------------------|-------------------------------------------------------------------------------------------------------------------------------------------------------------------------------------------------------------------------------------------------------------------------------------------------------------------------------------------------------------------------------|------|
| Trampush et al. 2015<br><br>Longitudinal study              | FES =175<br><br>(SCZ = 123; SCZ-phreniform = 35; SCZ-Aff=5; PD-NOS=12);<br>mean age=22.5y;<br>Gender (n. males) = 128<br>mean education=N/A.<br>Mean age at onset=N/A<br>DUP=N/A<br>DUI=N/A                       | SGA=175<br><br>93 = randomized to aripiprazole<br>82 = randomized to risperidone<br><br>Mean CPZe=N/A<br><br>Duration of treatment: all participants had less than 2w of prior antipsychotic exposure;<br>49 were antipsychotic-naive | SANS (excluding attention subscale)                                 | MCCB:<br>-Processing speed: SCCT and TMT-A<br>-Working memory: LNS and Spatial span<br>-Reasoning and Problem Solving: NAB Mazes<br>-Verbal Learning and Memory: HVLt-R<br>-Visual Learning and Memory: BVMT-R<br>-Attention/vigilance: CPT-IP<br>-Emotional processing: MSCEIT<br>-Global cognitive performance: Overall composite score | Improvements in general cognitive functioning after 3 m months were fully mediated by improvements in alogia ( $\beta = -1.53$ p= 0.0005);<br><br>Improvements in working memory were partially mediated by reductions in alogia ( $\beta = -2.00$ p= 0.0057);<br><br>Improvements in verbal learning were fully mediated by reductions in alogia ( $\beta = -1.65$ p=0.0007) | Good |
| Ventura et al. 2015<br><br>cross-sectional and longitudinal | Recent-onset (<2y) SSD=77 (SCZ=50; SCZ-A=7; SCZphreniform=20);<br>mean age=21.4y;<br>Gender (n. f males )= 60 M;<br>mean education=12.3y;<br>Mean age at onset=N/A<br>DUP=N/A<br>DUI=N/A<br>illness duration=7.1m | SGA=77<br><br>Mean CPZe=N/A<br><br>All patients were on a stable out-patient dose of risperidone for at least 3w                                                                                                                      | SANS (excluding attention subscale)                                 | - Neurocognitive composite score: MCCB<br><br>- ToM appropriateness/ intentionality/ length: SAT                                                                                                                                                                                                                                          | At baseline and after 6-month follow-up, both ToM intentionality and appropriateness were significantly related to negative symptoms ( $r=-0.29$ , $p < 0.01$ ; $r=-0.24$ , $p < 0.05$ at baseline and $r=-0.41$ , $p < 0.01$ , $r=-0.50$ , $p < 0.01$ at follow-up).<br><br>TOM impairment was found to correlated with both MAP and EXP both at baseline and follow-up.     | Good |
| Wong et al. 2021<br><br>Cross-sectional                     | FEP=347 (SSD= 217, psychotic disorder NOS= 130);<br>mean age= 38.3;<br>Gender (n. males)= 151;                                                                                                                    | FGA/SGA= N/A<br><br>Mean CPZe= 170.6 mg<br><br>Mean duration of treatment= N/A                                                                                                                                                        | SANS<br>MAP: items of the Avolition-apathy and Anhedonia-asociality | - Executive functions, verbal fluency: MWCSST;<br><br>- Processing speed: DSC;                                                                                                                                                                                                                                                            | MAP was significantly correlated with processing speed category verbal fluency and executive function scores ( $r=-0.235$ , $p < 0.001$ , $r=-0.145$ , $p < 0.01$ , $r=-0.171$ , $p < 0.01$ respectively)<br><br>EXP was significantly correlated with processing speed and verbal fluency ( $r=.201$ , $p < 0.001$ , $r=.190$ )                                              | Good |

|  |                                                                              |  |                                                                                                                                                 |                                                                                               |                         |  |
|--|------------------------------------------------------------------------------|--|-------------------------------------------------------------------------------------------------------------------------------------------------|-----------------------------------------------------------------------------------------------|-------------------------|--|
|  | mean<br>education=10.7y;<br>Mean age at<br>onset=N/A<br>DUP=17.4y<br>DUI=N/A |  | subscales of<br>SANS;<br>ED: items of the<br>Affective<br>flattening<br>subscale and the<br>poverty of speech<br>item of the<br>Alogia subscale | Working memory: digit<br>span subtest;<br><br>- Verbal fluency:<br>Category verbal<br>fluency | p < 0.001 respectively) |  |
|--|------------------------------------------------------------------------------|--|-------------------------------------------------------------------------------------------------------------------------------------------------|-----------------------------------------------------------------------------------------------|-------------------------|--|

**ANT**= Amsterdam Neuropsychological Task ;**ATT**= Animated triangles task; **BPD**= Brief Psychotic Disorder; **BVMT**= Brief Visuospatial Memory Task; **CPT**=Continuous Performance Test; **CRT**=Choice Reaction Time; **CVLT**=California Verbal Learning Test; **DACOBS**= Davos Assessment of Cognitive Biases Scale; **DD** = Delusional disorder; **D-KEFS**= Delis–Kaplan Executive Functioning System; **DSB**=Digit Span Backword; **DSF**= Digit span forward; **DSST**=Digit Symbol Sostitution Test; **DSC**= Digital Symbol Coding subtest **DUP**=Duration of Untreated Psychosis; **EXP**= Expressive Deficit domain of Negative Symptoms; **FEDT**= Face Emotion Discrimination Task; **FEIT**= Face Emotion Identification Test; **FEP** = First-Episode Psychosis; **FES**=First-Episode Schizophrenia; **HC**= healthy control; **HEN**= High Royds Evaluation of Negativity Scale; **HSCT-B**= Hayling Sentence Completion Test Part B **HVLT**= Hopkins Verbal Learning Test; **HVLT-R**= Hopkins Verbal Learning Test – Revised Version; **IRAOS**=Interview for Retrospective Assessment of Onset of Schizophrenia; **LNS**=Letter-Number Span; **MAP**= Motivational Deficit Domain of Negative Symptoms; **MCCB** = Matrics Consensus Cognitive Battery; **MCT**= Monotone counting test; **MSCEIT**= Mayer-Salovey-Caruso Emotional Intelligence Test; **MWCST**= Modified Wisconsin Card Sorting Test; **NAB**= Neuropsychological Assessment Battery **NS**= Negative Symptoms; **PD- NOS**=Psychotic disorder, not otherwise specified; **PNS**= Primary Negative Symptoms; **PRM**= Pattern Recognition Memory; **RAVLT**=Rey Auditory Verbal Learning Test; **ROCF**= Rey Osterrieth complex figure test; **SART**= sustained attention to response task ; **SAT**= Social Animation Task; **SANS**= Scale for the Assessment of Negative Symptoms; **SCID**=Structured Clinical Interview; **SCRT**= Social Cue Recognition Test **SCWT**=Stroop Color and Word Test; **SCZ**= Schizophrenia disorder; **SCZ-Aff**= Schizoaffective disorder; **SCZ-f**= schizopreniform disorder; **SFRT**= Situational Features Recognition Test; **SET**= Six element test; **SGA**=Second Generation Antipsychotic; **SRM**= Spatial Recognition Memory; **SSD**= Schizophrenia Spectrum Disorder; **TASIT**= The Awareness of Social Inference Test; **TMT**=Trail Making Test; **WAIS-III**=Wechsler Adult Intelligence Scale – Third Edition; **WAIS-R**= Wechsler Adult Intelligence Scale – Revised; **WASI**= Wechsler Abbreviated Scale of Intelligence; **WCST**= Wisconsin Card Sorting Test; **WMS-III**= Wechsler Memory Scale—Third Edition; **WMS-R**=Wechsler Memory Scale-Revised.

**Table S2. Details of the included studies on Subjects at High Risk of Psychosis**

| Author(s),<br>Year, study<br>design | Sample size/ Number of<br>Included Studies and<br>Characteristics of<br>included subjects | Pharmacological<br>treatment | Negative symptom<br>assessment | Cognitive deficit assessment                                                                      | Results                                                                                           | Study Quality |
|-------------------------------------|-------------------------------------------------------------------------------------------|------------------------------|--------------------------------|---------------------------------------------------------------------------------------------------|---------------------------------------------------------------------------------------------------|---------------|
| Barbato et al.<br>2015              | CHR=675(SIPS)<br>Mean Age=18.5y;<br>Gender (n. males)= 389;<br>Mean education =11.28y     | N/A                          | SOPS (N1-N6)                   | -Theory of mind: TASIT<br>-Facial affect processing:<br>ER40 and EDF40<br>-Social perception: RAD | There were no significant correlations<br>between any of the social cognition measures<br>and NS. | Poor          |

|                       |                                                                                                                                                                                                                                                                                 |                                        |                                                                                                                                                                                                                          |                                                                                                                                                                                                                                                                                                                           |                                                                                                                                                                                                                                                                                                                                                                                                                                                                                                                      |      |
|-----------------------|---------------------------------------------------------------------------------------------------------------------------------------------------------------------------------------------------------------------------------------------------------------------------------|----------------------------------------|--------------------------------------------------------------------------------------------------------------------------------------------------------------------------------------------------------------------------|---------------------------------------------------------------------------------------------------------------------------------------------------------------------------------------------------------------------------------------------------------------------------------------------------------------------------|----------------------------------------------------------------------------------------------------------------------------------------------------------------------------------------------------------------------------------------------------------------------------------------------------------------------------------------------------------------------------------------------------------------------------------------------------------------------------------------------------------------------|------|
| Cross-sectional       |                                                                                                                                                                                                                                                                                 |                                        |                                                                                                                                                                                                                          |                                                                                                                                                                                                                                                                                                                           |                                                                                                                                                                                                                                                                                                                                                                                                                                                                                                                      |      |
| Gerritsen et al. 2020 | CHR = 91 (recruited with COPS, confirmed with the SIPS);<br>mean age=20.8;<br>Gender (n. males)=57<br>Mean education= N/A                                                                                                                                                       | N/A                                    | SOPS (N1=social anhedonia or withdrawal;<br>N2=avolition;<br>N3=decreased expression of emotions;<br>N4=decreased experience of emotions and self;<br>N5=impoverished thinking;<br>N6=deterioration in role functioning) | MCCB<br><br>Speed of processing:<br>Symbol-Coding: TMTA<br><br>Verbal Fluency: Animal Naming<br><br>Attention/vigilance: CPT<br><br>Working Memory: LNS<br><br>Verbal learning and memory: HVLT-R<br><br>Visual learning and memory: BVMT<br><br>Reasoning and problem solving: Nab Mazes<br><br>Social cognition: MSCEIT | Canonical correlation revealed a single canonical correlation between cognition and NS which accounted for 38% of the variance in each canonical variate.<br>A single cognitive factor composed of verbal working memory, social cognition and vigilance is associated with NS;<br>LNS scores had the highest loading onto the canonical variate, indicating a high degree of overlap between verbal working memory and negative symptoms. The canonical variate accounted for 86% of the variability in LNS scores. | Poor |
| Glenthøj et al. 2017  | UHR=84 (CAARMS);<br><br>(Affective disorder=48;<br>anxiety disorder=50;<br>substance use disorder=9;<br>somatoform disorder=3;<br>eating disorder=2;<br>adjustment disorder=2;<br>personality disorder=15);<br>mean age=24.4y;<br>Gender (n. males)=35;<br>mean education=14.3y | 38 were taking antipsychotic treatment | SANS (excluding attention subscale)                                                                                                                                                                                      | BACS composite score                                                                                                                                                                                                                                                                                                      | NS significantly mediated the relationship between neurocognition and functioning: PSP ( $\beta = 0.23$ , $p = 0.02$ ), GF:Social ( $\beta = 0.23$ , $p = 0.02$ ), GF:Role ( $\beta = 0.23$ , $p = 0.02$ ), and SOFAS ( $\beta = 0.23$ , $p = 0.02$ ).                                                                                                                                                                                                                                                               | Good |
| Lindgren et al. 2010b | CHR=62 (SIPS)<br><br>mean age=16.5;<br>Gender (n. males)=43 M;<br>students in eight-                                                                                                                                                                                            | N/A                                    | SIPS (N1=social anhedonia or withdrawal; N2=avolition;<br>N3=decreased expression of emotions;                                                                                                                           | - Processing speed: TMT-A, TMT-B, TMT-C, DSC<br><br>- Verbal performance: verbal learning, vocabulary, visual reproduction                                                                                                                                                                                                | Negative symptoms correlated negatively with processing speed ( $r=-0.31$ ; $p=.014$ ) and verbal performance ( $r=-.37$ ; $p=.003$ ); no correlations were found with visuospatial performance.                                                                                                                                                                                                                                                                                                                     | Poor |

|                                            |                                                                                         |                                                                                                                         |                                                                                                                                                                                                 |                                                                                                                                                                                                                                                                                                                           |                                                                                                                                                                                                                                                                                                                                                                                                                                                                                                                                                                                                                                                                          |      |
|--------------------------------------------|-----------------------------------------------------------------------------------------|-------------------------------------------------------------------------------------------------------------------------|-------------------------------------------------------------------------------------------------------------------------------------------------------------------------------------------------|---------------------------------------------------------------------------------------------------------------------------------------------------------------------------------------------------------------------------------------------------------------------------------------------------------------------------|--------------------------------------------------------------------------------------------------------------------------------------------------------------------------------------------------------------------------------------------------------------------------------------------------------------------------------------------------------------------------------------------------------------------------------------------------------------------------------------------------------------------------------------------------------------------------------------------------------------------------------------------------------------------------|------|
|                                            | grade/senior high school=0; inpatients=18                                               |                                                                                                                         | N4=decreased experience of emotions and self; N5=decreased ideational richness (comprehension and abstraction); N6=deterioration in role functioning)                                           | - Visuospatial performance: visual reproduction, block design, matrix reasoning, similarities                                                                                                                                                                                                                             |                                                                                                                                                                                                                                                                                                                                                                                                                                                                                                                                                                                                                                                                          |      |
| Leanza et al. 2018b<br><br>Cross-sectional | CHR = 154 (BSIP);<br>mean age=25.9y;<br>Gender (n. males)= 104;<br>mean education=11.6y | Antipsychotics currently:<br>Untreated=142<br><br>SGA=11<br><br>(total cumulative lifetime dose = 2500 CPZ equivalents) | SANS total score and subscales                                                                                                                                                                  | Verbal IQ: MWT-A;<br><br>Non-Verbal IQ: LPS;<br><br>Planning Ability: Tower of Hanoi;<br><br>Cognitive Flexibility: WCST;<br><br>Verbal Fluency: VF Test;<br><br>Verbal Learning and memory: CVLT;<br><br>Selective Attention and Reaction Inhibition: TAP Go/No-Go;<br><br>Working memory: TAP-WM;<br><br>Vigilance: CPT | SANS total score was significantly and negatively correlated with verbal fluency ( $r = -0.040$ , $p = 0.020$ ) and non-verbal IQ ( $r = -0.020$ , $p = 0.040$ ), but not with Planning, Cognitive flexibility, Verbal learning & memory, Selective attention & inhibition, Working memory, or Vigilance. Alogia was significantly associated with both nonverbal IQ ( $r = 0.024$ , $p < .05$ ) and verbal fluency ( $r = 0.024$ , $p < .05$ ). Asociality/Anhedonia was significantly associated with nonverbal IQ ( $r = .023$ , $p < .05$ ). The subscales Affective Flattening, Avolition/Apathy and Inattention did not withstand correction for multiple testing. | Poor |
| Meyer et al. 2014<br><br>Longitudinal      | CHR: 371 (SIPS);<br>mean age=18.2;<br>Gender (n. male)= 234<br>Mean education= N/A      | 6 patients were taking antipsychotic medications (3.6%)                                                                 | SIPS (social anhedonia or withdrawal, avolition, decreased expression of emotions, decreased experience of emotions and self, decreased ideational richness, deterioration in role functioning) | -Verbal memory: Vocabulary;<br><br>-Visual-perceptual-organization:Block Design;<br><br>Attention/Vigilance: CPT, identical pairs version;<br><br>-Processing speed:DSC;<br><br>-Verbal fluency: COWA;<br>- problem solving: WCST                                                                                         | SIPS-negative score correlated with verbal comprehension ( $r = -0.21$ $p < 0.01$ ), processing speed measured with both digit symbol and TMT-A ( $r = -0.34$ $p < 0.001$ , $r = -0.21$ $p < 0.01$ ), vigilance ( $r = -0.32$ $p < 0.001$ ), verbal fluency ( $r = -0.24$ $p < 0.01$ ), problem solving ( $r = -0.33$ $p < 0.001$ ) and verbal memory ( $r = -0.30$ $p < 0.001$ ).<br><br>SIPS-social anhedonia correlated with lower problem-solving scores ( $r = -0.20$ , $p < 0.05$ ), processing speed ( $r = -0.22$ , $p < 0.05$ ) and global neurocognition ( $r = -0.23$ , $p < 0.05$ ),                                                                         | Poor |

|                                                   |                                                                                                |                                                                                        |                                                                                                                                                                                                        |                                                                                                                                                                                                                                                                                                                                                         |                                                                                                                                                                                                                                                                                                                                                                                                                                                                                                                                                                                                                                                                                                                                                                                                                                                                                                                                                                                                                                                                                           |                |
|---------------------------------------------------|------------------------------------------------------------------------------------------------|----------------------------------------------------------------------------------------|--------------------------------------------------------------------------------------------------------------------------------------------------------------------------------------------------------|---------------------------------------------------------------------------------------------------------------------------------------------------------------------------------------------------------------------------------------------------------------------------------------------------------------------------------------------------------|-------------------------------------------------------------------------------------------------------------------------------------------------------------------------------------------------------------------------------------------------------------------------------------------------------------------------------------------------------------------------------------------------------------------------------------------------------------------------------------------------------------------------------------------------------------------------------------------------------------------------------------------------------------------------------------------------------------------------------------------------------------------------------------------------------------------------------------------------------------------------------------------------------------------------------------------------------------------------------------------------------------------------------------------------------------------------------------------|----------------|
|                                                   |                                                                                                |                                                                                        |                                                                                                                                                                                                        |                                                                                                                                                                                                                                                                                                                                                         | <p>but not with vocabulary, visual perceptual organization, attention/vigilance;<br/> SIPS-avolition correlated with lower processing speed (<math>r = -0.20</math>, <math>p &lt; 0.05</math>), problem solving (<math>r = -0.19</math>, <math>p &lt; 0.05</math>) and global scores (<math>r = -0.20</math>, <math>p &lt; 0.05</math>) and vigilance, but not with vocabulary, organization, fluency. and vigilance;<br/> SIPS-Decreased expression of emotions correlated with verbal fluency (<math>r = -0.18</math>, <math>p &lt; 0.05</math>), problem solving (<math>r = -0.19</math>, <math>p &lt; 0.05</math>), processing speed (<math>r = -0.20</math>, <math>p &lt; 0.05</math>), global neurocognitive scores (<math>r = -0.22</math>, <math>p &lt; 0.05</math>), but not with vocabulary, organization and vigilance;<br/> SIPS-Decreased experience of emotions did not correlate with neurocognition;<br/> SIPS-decreased ideational richness correlated with each neurocognitive test score (<math>r = -0.18</math> to <math>-0.36</math>, <math>p &lt; 0.05</math>);</p> |                |
| <p>Niendam et al. 2006</p> <p>Cross-sectional</p> | <p>CHR: 45 (SIPS);<br/> mean age=17.66;<br/> Gender (n. male)= 29<br/> Mean education= N/A</p> | <p>SGA= 19<br/> mood stabilizers=6<br/> antidepressants=22<br/> psychostimulants=3</p> | <p>SIPS (social anhedonia or withdrawal, avolition, decreased expression of emotions, decreased experience of emotions and self, decreased ideational richness, deterioration in role functioning)</p> | <p>-Processing speed: TMT-A/B, DSC, FAS and Animal Naming subtests of the Verbal Fluency Test</p> <p>-Reasoning and problem solving: WASI Matrix Reasoning</p> <p>-Visual learning and memory: WMS-III Visual Reproduction Immediate and Delayed Recall</p> <p>-Verbal learning and memory: CLVT</p> <p>Verbal working memory: Digit Span Backwards</p> | <p>SOPS Negative Symptom score was not significantly correlated with any neurocognitive variables of interest</p>                                                                                                                                                                                                                                                                                                                                                                                                                                                                                                                                                                                                                                                                                                                                                                                                                                                                                                                                                                         | <p>Average</p> |
| <p>Pelizza et al. 2021</p>                        | <p>UHR = 51 (CAARMS early version)<br/> mean age=15.5y;</p>                                    | <p>Low-dose atypical antipsychotic were</p>                                            | <p>CAARMS factor 1 ("Negative-</p>                                                                                                                                                                     | <p>Subjective experience related to cognitive: I-GEOPT</p>                                                                                                                                                                                                                                                                                              |                                                                                                                                                                                                                                                                                                                                                                                                                                                                                                                                                                                                                                                                                                                                                                                                                                                                                                                                                                                                                                                                                           | <p>Poor</p>    |

|                                         |                                                                                                                                                                                        |                                                                                                                                                                                                                                                               |                                     |                                                                                                                                                                                                                                                                                                                                       |                                                                                                                                                                                                                                                                                                                                                                                                                                                                                                                                                                                                                                                                                                                                                                                       |         |
|-----------------------------------------|----------------------------------------------------------------------------------------------------------------------------------------------------------------------------------------|---------------------------------------------------------------------------------------------------------------------------------------------------------------------------------------------------------------------------------------------------------------|-------------------------------------|---------------------------------------------------------------------------------------------------------------------------------------------------------------------------------------------------------------------------------------------------------------------------------------------------------------------------------------|---------------------------------------------------------------------------------------------------------------------------------------------------------------------------------------------------------------------------------------------------------------------------------------------------------------------------------------------------------------------------------------------------------------------------------------------------------------------------------------------------------------------------------------------------------------------------------------------------------------------------------------------------------------------------------------------------------------------------------------------------------------------------------------|---------|
| Longitudinal                            | Gender (n. males)=20;<br>mean education=10.3;<br>DUI=61w                                                                                                                               | used only in subjects who:<br>–had an imminent risk of suicide or severe violence or<br>-were overwhelmed by abruptly worsening overt psychotic symptoms or<br>-were rapidly deteriorating in daily functioning or<br>-did not respond to any other treatment | interpersonal Dimension”)           | “Basic cognitive functions” subscore<br><br>Subjective experience related to social cognitive impairment: I-GEOPTTE “Social Cognition” subscore                                                                                                                                                                                       | The GEOPTTE “Basic Cognitive Functions” subscale score did not show any correlation with CAARMS factor 1 score;<br><br>The GEOPTTE “Social Cognition” subscale score showed significant positive correlations with CAARMS factor 1 score ( $r = 0.400$ , $p = 0.0001$ );<br><br>After 2 years of follow-up, $\Delta$ T0-T2 I-GEOPTTE total score showed significant positive correlations with $\Delta$ T0-T2 CAARMS Negative symptoms score ( $r=0.747$ , $p = 0.0001$ ), Avolition-apathy in particular ( $r=0.803$ , $p = 0.0001$ )                                                                                                                                                                                                                                                |         |
| Shin et al. 2016<br><br>Longitudinal    | CHR=47 (CAARMS early version+SIPS);<br>mean age=19.3y;<br>Gender (n. males)= 33;<br>mean education=12.0y                                                                               | N/A                                                                                                                                                                                                                                                           | SOPS-negative                       | - Working memory: digit test from K-WAIS<br>-Processing speed: TMT-A<br>-Executive function: TMT-B; WCST- Perseveration<br>-Verbal fluency: letter and semantic fluency<br>-Verbal memory: K-CVLT<br>-Visual memory: RCFT                                                                                                             | After the 2-year follow-up, the change of semantic fluency significantly related to changes in SOPS-negative ( $r=0.460$ , $p=0.001$ );                                                                                                                                                                                                                                                                                                                                                                                                                                                                                                                                                                                                                                               | Average |
| Üçok et al. 2021<br><br>Cross-sectional | UHR = 107 (Three criteria: (a) BLIPS, (b) attenuated psychotic symptoms and (c) family risk with reduced function)<br>mean age=20.4y;<br>Gender (n. males)= 83<br>mean education=10.5y | Antipsychotic naïve                                                                                                                                                                                                                                           | SANS (excluding attention subscale) | -Verbal learning and memory: RAVLT;<br><br>-Selective attention, interference inhibition, processing speed, cognitive flexibility and executive functions: SCWT<br><br>-Executive function and working memory: WCST<br><br>-Working memory: DSB;<br><br>-Processing speed, sequencing, mental flexibility and working memory: TMT A/B | TMT-A (time) was positively correlated with SANS-alogia ( $r=0.26$ , $p<0.05$ ); TMT-B was positively correlated with SANS total score ( $r=0.40$ ; $p<.001$ ) and with all the SANS subdomain scores (affective: $r = 0.35$ ; $p<0.001$ ; alogia: $r = 0.42$ ; $p<0.001$ ; avolition: $r = 0.29$ ; $p <0.01$ ; anhedonia: $r = 0.30$ , $p<0.01$ ).<br>Executive functions and working memory were negatively correlated with SANS total ( $r=-0.21$ , $p<0.05$ ), SANS-affective ( $r=-0.20$ , $p<0.05$ ) and SANS-alogia ( $r=-0.23$ , $p<0.05$ ).<br>Attention composite score was negatively correlated with SANS total score ( $r=-0.26$ , $p<0.01$ ), SANS-affective ( $r=-0.25$ , $p<0.05$ ), SANS-alogia ( $r=-0.29$ , $p<0.01$ ) and SANS-anhedonia ( $r=-0.16$ , $p<0.05$ ) | Average |

|                                       |                                                                                    |                                             |                                                                                                                                                             |                                    |                                                                                                                                                                                                                                                                                                 |      |
|---------------------------------------|------------------------------------------------------------------------------------|---------------------------------------------|-------------------------------------------------------------------------------------------------------------------------------------------------------------|------------------------------------|-------------------------------------------------------------------------------------------------------------------------------------------------------------------------------------------------------------------------------------------------------------------------------------------------|------|
| Vargas et al. 2018<br>cross-sectional | UHR= 45 (SIPS);<br>mean age=18.9y;<br>Gender (n. males)= 24<br>Mean education= N/A | Neuroleptic-free= 41<br>SGA=4<br>CPZe=152.1 | SIPS:<br>Social Anhedonia;<br>Avolition;<br>Expression of emotion;<br>Expressions of emotions and self;<br>Ideational richness;<br>Occupational functioning | Verbal memory=verb generation task | Selection costs of the verb generation task were positively associated with disorganized symptom score (r=0.409, p=0.01) and negative symptom score (r=0.38, p=0.01) and particularly with social anhedonia (r=0.29, p=0.03), avolition (r=0.5, p<0.001), ideational richness (r=0.3, p=0.025). | Poor |
|---------------------------------------|------------------------------------------------------------------------------------|---------------------------------------------|-------------------------------------------------------------------------------------------------------------------------------------------------------------|------------------------------------|-------------------------------------------------------------------------------------------------------------------------------------------------------------------------------------------------------------------------------------------------------------------------------------------------|------|

**BLIPS**= Brief Limited Intermittent Psychotic Symptoms; **BSIP**= Basel Screening Instrument for Psychosis; **BVMT**= Brief Visuospatial Memory Task; **CAARMS**= Comprehensive Assessment of At-Risk Mental States; **COPS** = Criteria of psychosis-risk syndrome; **CPT**=Continuous Performance Test; **CVLT**=California Verbal Learning Test; **DSB**=Digit Span Backward; **DSC**= Digital Symbol Coding subtest; **ER40**= Penn Emotion Recognition Task; **EDF40**= Penn Emotion Differentiation Task; **EXP**= Expressive Deficit domain of Negative Symptoms; **GF** = Global functioning scale; **HVLT**= Hopkins Verbal Learning Test; **HVLT-R**= Hopkins Verbal Learning Test – Revised Version; **IED**= Intra/Extra Dimensional Set Shift; **LNS**=Letter-Number Span; **LPS**= Leistungsprüfungssystem; **MAP**= Motivational Deficit Domain of Negative Symptoms; **MCCB** = Matrices Consensus Cognitive Battery; **MSCEIT**= Mayer-Salovey-Caruso Emotional Intelligence Test; **MWT-A**= Mehrfachwahl-Wortschatz-Test; **NAB**= Neuropsychological Assessment Battery; **NS**= Negative Symptoms; **PNS**= Primary Negative Symptoms; **PQ**= Prodromal Questionnaire; **RAD**= Relationship Across Domains; **RAVLT**=Rey Auditory Verbal Learning Test; **SANS**= Scale for the Assessment of Negative Symptoms; **SCWT**=Stroop Color and Word Test; **SCZ**=Patients with a diagnosis of schizophrenia; **SCZ-Aff**= Schizoaffective disorder; **SCZ-f**= schizophreniform disorder; **SFRT**= Situational Features Recognition Test; **SGA**=Second Generation Antipsychotic; **SIPS**= Structured Interview for Prodromal Syndromes; **SOFAS**= Social and Occupational Functioning Assessment Scale; **SOPS**= Scales Of Prodromal Symptoms; **TAP-WM**= Test of Attentional Performance, WM subtest; **TASIT**= The Awareness of Social Inference Test; **TMT**=Trail Making Test; **VPT**= Visual pattern test;

**Table S3. Neurocognitive and Social Cognition assessment tools adopted in the included studies**

|                                |             |                                                                  |
|--------------------------------|-------------|------------------------------------------------------------------|
| Neurocognitive composite score | BACS        | Bliksted et al. 2017<br>Glenthøj et al. 2017                     |
|                                | MCCB        | Ventura et al. 2015                                              |
| Processing Speed               | Stroop test | Huang et al. 2016<br>Üçok et al. 2021<br>Buck et al. 2020        |
|                                | TMT         | Huang et al. 2016<br>Trampush et al. 2015<br>Stouten et al. 2017 |



|                            |                                  |                                                                                                                    |
|----------------------------|----------------------------------|--------------------------------------------------------------------------------------------------------------------|
|                            |                                  | Shin et al. 2016<br>Rodríguez-Sánchez et al. 2008<br>Üçok et al. 2021<br>Lindgren et al. 2010b<br>Buck et al. 2020 |
|                            | DSST                             | Meyer et al. 2014<br>Chang et al. 2020a<br>Wong et al. 2021<br>Lindgren et al. 2010b<br>Buck et al. 2020           |
|                            | WAIS III Digit symbol subtest    | Engen et al. 2019                                                                                                  |
|                            | D-KEFS                           | Engen et al. 2019                                                                                                  |
|                            | DSC                              | Glenthøj et al. 2017<br>Trampush et al. 2015                                                                       |
|                            | MCCB                             | Ventura et al. 2015<br>Gerritsen et al. 2020                                                                       |
| <b>Verbal fluency</b>      | COWA                             | Meyer et al. 2014<br>Ayres et al. 2007                                                                             |
|                            | letter and semantic fluency test | Shin et al. 2016                                                                                                   |
|                            | Category verbal fluency          | Chang et al. 2014<br>Chang et al. 2017<br>Stouten et al. 2017<br>Leanza et al. 2018b                               |
|                            | MCWST                            | Chang et al. 2020a<br>Wong et al. 2021                                                                             |
|                            | D-KEFS                           | Engen et al. 2019                                                                                                  |
|                            | Animal naming test               | Hegde et al. 2013<br>Gerritsen et al. 2020                                                                         |
|                            | FAS                              | Rodríguez-Sánchez et al. 2008                                                                                      |
| <b>Attention/Vigilance</b> | Choice reaction test             | Saleem et al. 2013                                                                                                 |

|                       |                                                     |                                                                                                      |
|-----------------------|-----------------------------------------------------|------------------------------------------------------------------------------------------------------|
|                       | Digit Span and Letter<br>Number sequencing test     | Engen et al. 2019                                                                                    |
|                       | Digit span forward                                  | Faerden et al. 2009                                                                                  |
|                       | TMT-A                                               | Buck et al. 2020                                                                                     |
|                       | Brief test of attention                             | Rodríguez-Sánchez et al. 2008                                                                        |
|                       | MCCB                                                | Trampush et al. 2015<br>Ventura et al. 2015<br>Gerritsen et al. 2020                                 |
|                       | Digit vigilance test                                | Hegde et al. 2013                                                                                    |
|                       | Continuous Performance test (sustained + selective) | Huang et al. 2016<br>Rodríguez-Sánchez et al. 2008<br>Stouten et al. 2017<br>Chan et al. 2006        |
|                       | Color trails test                                   | Hegde et al. 2013                                                                                    |
|                       | Stroop test                                         | Üçok et al. 2021<br>Buck et al. 2020                                                                 |
|                       | Go/No-Go Test (GNG)                                 | Leanza et al. 2018b                                                                                  |
|                       | Triads test                                         | Hegde et al. 2013                                                                                    |
| <b>Working Memory</b> | WAIS-R digit span subtest                           | Chang et al. 2016<br>Chang et al. 2017<br>Chang et al. 2020a<br>Wong et al. 2021<br>Shin et al. 2016 |
|                       | WAIS-III                                            | Üçok et al. 2021<br>Stouten et al. 2017<br>Shin et al. 2016                                          |
|                       | MCCB                                                | Ventura et al. 2015<br>Gerritsen et al. 2020<br>Trampush et al. 2015                                 |

|                                   |                                             |                                                                                               |
|-----------------------------------|---------------------------------------------|-----------------------------------------------------------------------------------------------|
|                                   | LNS                                         | Faerden et al. 2009                                                                           |
|                                   | SOC                                         | Saleem et al. 2013                                                                            |
|                                   | TAP                                         | Leanza et al. 2018b                                                                           |
|                                   | Verbal N-back-task                          | Hegde et al. 2013                                                                             |
|                                   | MCCB                                        | Gerritsen et al. 2020                                                                         |
|                                   | LNS subtest                                 | Stouten et al. 2017                                                                           |
| <b>Verbal Learning and Memory</b> | RAVLT                                       | Hegde et al. 2013<br>Rodríguez-Sánchez et al. 2008<br>Stouten et al. 2017<br>Üçok et al. 2021 |
|                                   | WMS (logical memory)                        | Engen et al. 2019                                                                             |
|                                   | HVLT                                        | Trampush et al. 2015<br>Ventura et al. 2015<br>Gerritsen et al. 2020                          |
|                                   | BACS                                        | Glenthøj et al. 2017                                                                          |
|                                   | Logical Memory Immediate and Delayed Recall | Buck et al. 2020                                                                              |
|                                   | California verbal learning test-II          | Engen et al. 2019<br>Leanza et al. 2018b                                                      |
| <b>Visual Learning and Memory</b> | ROCF                                        | Hegde et al. 2013                                                                             |
|                                   | Visual reproduction subtests                | Buck et al. 2020                                                                              |
|                                   | BVMT                                        | Trampush et al. 2015<br>Stouten et al. 2017<br>Ventura et al. 2015<br>Gerritsen et al. 2020   |

|                                      |                                   |                                                                                                     |
|--------------------------------------|-----------------------------------|-----------------------------------------------------------------------------------------------------|
| <b>Executive Functions</b>           | WCST                              | Chang et al. 2016<br>Huang et al. 2016<br>Shin et al., 2016<br>Üçok et al. 2021<br>Chan et al. 2006 |
|                                      | D-KEFS                            | Engen et al., 2019<br>Faerden et al. 2009                                                           |
|                                      | Stroop Test                       | Chang et al., 2016<br>Üçok et al. 2021<br>Chan et al. 2006                                          |
|                                      | TMT-B                             | Shin et al., 2016<br>Buck et al., 2020<br>Chan et al. 2006                                          |
|                                      | MCCB                              | Gerritsen et al. 2020<br>Ventura et al. 2015                                                        |
|                                      | BACS                              | Glenthøj et al. 2017<br>Bliksted et al. 2017                                                        |
|                                      | Penn CNB                          | Gur et al. 2015                                                                                     |
|                                      | Intra/Extra Dimensional Set Shift | Saleem et al. 2013                                                                                  |
|                                      | NAB Mazes                         | Trampush et al. 2015<br>Ventura et al. 2015                                                         |
|                                      |                                   |                                                                                                     |
| <b>Reasoning and problem solving</b> | NAB Mazes                         | Gerritsen et al. 2020<br>Trampush et al. 2015                                                       |
|                                      | WCST                              | Meyer et al. 2014                                                                                   |
|                                      | Tower of London                   | Stouten et al. 2017                                                                                 |
|                                      | Tower of Hanoi                    | Chan et al. 2006                                                                                    |
| <b>Social Cognition</b>              | MSCEIT                            | Trampush et al. 2015<br>Gerritsen et al. 2020                                                       |
|                                      | TASIT                             | Bliksted et al. 2017                                                                                |

|  |                                                               |                                        |
|--|---------------------------------------------------------------|----------------------------------------|
|  | SCRT                                                          | Piskulic and Addington 2011            |
|  | RAD                                                           | Barbato et al. 2015                    |
|  | DACOBS                                                        | Stouten et al. 2017                    |
|  | ANT                                                           | Stouten et al. 2017                    |
|  | Hinting task                                                  | Stouten et al. 2017                    |
|  | TASIT                                                         | Barbato et al. 2015                    |
|  | ANT                                                           | Ditlevsen, Simonsen, and Bliksted 2020 |
|  | ToM advanced task                                             | Mazza et al. 2012                      |
|  | SAT                                                           | Ventura et al. 2015                    |
|  | FEIT<br>FEDT                                                  | Piskulic and Addington 2011            |
|  | ER40, EDF40                                                   | Barbato et al. 2015                    |
|  | WAIS-III-picture arrangement                                  | Stouten et al. 2017                    |
|  | i-GEOPTE-social cognition/basic cognitive functions subscores | Pelizza et al. 2021                    |

**ANT**= Animated Triangles Task; **BVMT**= Brief Visuospatial Memory Task; **DACOBS**= Davos Assessment of Cognitive Biases Scale; **DSC**= Digital Symbol Coding subtest; **DSST**=Digit symbol substitution test **D-KEFS**= Delis–Kaplan Executive Functioning System; **ER40**= Penn Emotion Recognition Task; **EDF40**= Penn Emotion Differentiation Task; **EXP**= Expressive Deficit domain of

Negative Symptoms; **FAS**= Fluency Test; **FEDT**= Face Emotion Discrimination Task; **HEN**= High Royds Evaluation of Negativity Scale; **HVLT**= Hopkins Verbal Learning Test; **HVLT-R**= Hopkins Verbal Learning Test – Revised Version; **LNS**=Letter-Number Span; **MCCB** = Matrics Consensus Cognitive Battery; **MSCEIT**= Mayer-Salovey-Caruso Emotional Intelligence Test; **NAB**= Neuropsychological Assessment Battery; **RAD**= Relationship Across Domains; **ROCF**= Rey Osterrieth complex figure test; **SAT**= Social Animation Task; **SCRT**= Social Cue Recognition Test; **SOC**= Stocking of Cambridge; **TAP-WM**= Test of Attentional Performance, WM subtest; **TASIT**= The Awareness of Social Inference Test; **TAP**= Test of Attentional Performance; **TMT**=Trail Making Test; **WCST**= Wisconsin Card Sorting Test; **WMS-R**=Wechsler Memory Scale-Revised.

## References

- Ayres, A. M., G. F. Busatto, P. R. Menezes, M. S. Schaufelberger, L. Coutinho, R. M. Murray, P. K. McGuire, T. Rushe, and M. Scazufca. 2007. 'Cognitive deficits in first-episode psychosis: a population-based study in São Paulo, Brazil', *Schizophr Res*, 90: 338-43.
- Barbato, Mariapaola, Lu Liu, Kristin S. Cadenhead, Tyrone D. Cannon, Barbara A. Cornblatt, Thomas H. McGlashan, Diana O. Perkins, Larry J. Seidman, Ming T. Tsuang, Elaine F. Walker, Scott W. Woods, Carrie E. Bearden, Daniel H. Mathalon, Robert Heinssen, and Jean Addington. 2015. 'Theory of mind, emotion recognition and social perception in individuals at clinical high risk for psychosis: Findings from the NAPLS-2 cohort', *Schizophrenia Research: Cognition*, 2: 133-39.

- Bliksted, Vibeke, Poul Videbech, Birgitte Fagerlund, and Chris Frith. 2017. 'The effect of positive symptoms on social cognition in first-episode schizophrenia is modified by the presence of negative symptoms', *Neuropsychology*, 31: 209-19.
- Buck, G., K. M. Lavigne, C. Makowski, R. Joober, A. Malla, and M. Lepage. 2020. 'Sex Differences in Verbal Memory Predict Functioning Through Negative Symptoms in Early Psychosis', *Schizophr Bull*, 46: 1587-95.
- Chan, R. C., E. Y. Chen, and C. W. Law. 2006. 'Specific executive dysfunction in patients with first-episode medication-naïve schizophrenia', *Schizophr Res*, 82: 51-64.
- Chang, W. C., C. L. Hui, S. K. Chan, E. H. Lee, G. H. Wong, and E. Y. Chen. 2014. 'Relationship between diminished expression and cognitive impairment in first-episode schizophrenia: a prospective three-year follow-up study', *Schizophr Res*, 152: 146-51.
- Chang, W. C., V. W. Y. Kwong, C. L. M. Hui, S. K. W. Chan, E. H. M. Lee, and E. Y. H. Chen. 2017. 'Relationship of amotivation to neurocognition, self-efficacy and functioning in first-episode psychosis: a structural equation modeling approach', *Psychol Med*, 47: 755-65.
- Chang, W. C., C. S. M. Wong, P. C. F. Or, A. O. K. Chu, C. L. M. Hui, S. K. W. Chan, E. M. H. Lee, Y. N. Suen, and E. Y. H. Chen. 2020a. 'Inter-relationships among psychopathology, premorbid adjustment, cognition and psychosocial functioning in first-episode psychosis: a network analysis approach', *Psychol Med*, 50: 2019-27.
- . 2020b. 'Inter-relationships among psychopathology, premorbid adjustment, cognition and psychosocial functioning in first-episode psychosis: a network analysis approach', *Psychol Med*, 50: 2019-27.
- Chang, Wing Chung, Charles Fu Chun Lau, Sherina Suet In Chan, Christy Lai Ming Hui, Sherry Kit Wa Chan, Edwin Ho Ming Lee, Jingxia Lin, and Eric Yu Hai Chen. 2016. 'Premorbid, clinical and cognitive correlates of primary negative symptoms in first-episode psychosis', *Psychiatry Res*, 242: 144-49.
- Ditlevsen, Jonas Vennike, Arndis Simonsen, and Vibeke Fuglsang Bliksted. 2020. 'Predicting mentalizing deficits in first-episode schizophrenia from different subdomains of negative symptoms', *Schizophr Res*, 215: 439-41.
- Engen, Magnus Johan, Carmen Simonsen, Ingrid Melle, Ann Færden, Siv Hege Lyngstad, Beathe Haatveit, Anja Vaskinn, and Torill Ueland. 2019. 'Cognitive functioning in patients with first-episode psychosis stratified by level of negative symptoms: A 1-year follow-up study', *Psychiatry Res*, 281: 112554.
- Færden, A., A. Vaskinn, A. Finset, I. Agartz, E. Ann Barrett, S. Friis, C. Simonsen, O. A. Andreassen, and I. Melle. 2009. 'Apathy is associated with executive functioning in first episode psychosis', *BMC Psychiatry*, 9: 1.
- Gerritsen, C., M. Maheandiran, J. Lepock, S. Ahmed, M. Kiang, R. M. Bagby, and R. Mizrahi. 2020. 'Negative symptoms in the clinical high-risk state for psychosis: Connection with cognition and primacy in impacting functioning', *Early Interv Psychiatry*, 14: 188-95.
- Glenthøj, L. B., J. R. Jepsen, C. Hjorthøj, N. Bak, T. D. Kristensen, C. Wenneberg, K. Krakauer, M. Nordentoft, and B. Fagerlund. 2017. 'Negative symptoms mediate the relationship between neurocognition and function in individuals at ultrahigh risk for psychosis', *Acta Psychiatr Scand*, 135: 250-58.
- Gur, R. E., M. March, M. E. Calkins, L. Weittenhiller, D. H. Wolf, B. I. Turetsky, and R. C. Gur. 2015. 'Negative symptoms in youths with psychosis spectrum features: complementary scales in relation to neurocognitive performance and function', *Schizophr Res*, 166: 322-7.

- Hegde, S., J. Thirthalli, S. L. Rao, A. Raguram, M. Philip, and B. N. Gangadhar. 2013. 'Cognitive deficits and its relation with psychopathology and global functioning in first episode schizophrenia', *Asian J Psychiatry*, 6: 537-43.
- Huang, M., Y. Huang, L. Yu, J. Hu, J. Chen, P. Jin, W. Xu, N. Wei, S. Hu, H. Qi, and Y. Xu. 2016. 'Relationship between negative symptoms and neurocognitive functions in adolescent and adult patients with first-episode schizophrenia', *BMC Psychiatry*, 16: 344.
- Leanza, L., L. Egloff, E. Studerus, C. Andreou, U. Heitz, S. Ittig, K. Beck, M. Uttinger, and A. Riecher-Rössler. 2018a. 'The relationship between negative symptoms and cognitive functioning in patients at clinical high risk for psychosis', *Psychiatry Res*, 268: 21-27.
- Leanza, Letizia, Laura Egloff, Erich Studerus, Christina Andreou, Ulrike Heitz, Sarah Ittig, Katharina Beck, Martina Uttinger, and Anita Riecher-Rössler. 2018b. 'The relationship between negative symptoms and cognitive functioning in patients at clinical high risk for psychosis', *Psychiatry Res*, 268: 21-27.
- Lee, E. H. M., C. L. M. Hui, K. P. K. Chan, P. Y. Chan, E. Y. L. Law, C. S. Y. Chong, W. C. Chang, S. K. W. Chan, W. K. Lee, A. W. F. Lo, E. P. F. Pang, E. F. C. Cheung, M. G. C. Yiu, D. W. S. Chung, R. M. K. Ng, W. S. Yeung, W. T. L. Lo, and E. Y. H. Chen. 2019. 'The role of symptoms and insight in mediating cognition and functioning in first episode psychosis', *Schizophr Res*, 206: 251-56.
- Lindgren, M., M. Manninen, T. Laajasalo, U. Mustonen, H. Kalska, J. Suvisaari, K. Moilanen, T. D. Cannon, M. Huttunen, and S. Therman. 2010a. 'The relationship between psychotic-like symptoms and neurocognitive performance in a general adolescent psychiatric sample', *Schizophr Res*, 123: 77-85.
- Lindgren, Maija, Marko Manninen, Taina Laajasalo, Ulla Mustonen, Hely Kalska, Jaana Suvisaari, Kari Moilanen, Tyrone D. Cannon, Matti Huttunen, and Sebastian Therman. 2010b. 'The relationship between psychotic-like symptoms and neurocognitive performance in a general adolescent psychiatric sample', *Schizophr Res*, 123: 77-85.
- Mazza, M., R. Pollice, F. Pacitti, M. C. Pino, M. Mariano, S. Tripaldi, M. Casacchia, and R. Roncone. 2012. 'New evidence in theory of mind deficits in subjects with chronic schizophrenia and first episode: correlation with symptoms, neurocognition and social function', *Riv Psichiatr*, 47: 327-36.
- Meyer, E. C., R. E. Carrión, B. A. Cornblatt, J. Addington, K. S. Cadenhead, T. D. Cannon, T. H. McGlashan, D. O. Perkins, M. T. Tsuang, E. F. Walker, S. W. Woods, R. Heinssen, and L. J. Seidman. 2014. 'The relationship of neurocognition and negative symptoms to social and role functioning over time in individuals at clinical high risk in the first phase of the North American Prodrome Longitudinal Study', *Schizophr Bull*, 40: 1452-61.
- Niendam, Tara A., Carrie E. Bearden, Jennifer K. Johnson, Malin McKinley, Rachel Loewy, Mary O'Brien, Keith H. Nuechterlein, Michael F. Green, and Tyrone D. Cannon. 2006. 'Neurocognitive performance and functional disability in the psychosis prodrome', *Schizophrenia Research*, 84: 100-11.
- Pelizza, L., D. Maestri, E. Leuci, E. Quattrone, S. Azzali, G. Paulillo, and P. Pellegrini. 2021. 'Negative symptom configuration in patients with first episode affective psychosis: findings from the 1-year follow-up of the "Parma Early Psychosis" program', *Acta Biomed*, 92: e2021224.
- Piskulic, Danijela, and Jean Addington. 2011. 'Social cognition and negative symptoms in psychosis', *Psychiatry Res*, 188: 283-85.



- Rodríguez-Sánchez, J. M., B. Crespo-Facorro, C. González-Blanch, R. Pérez-Iglesias, M. Álvarez-Jiménez, O. Martínez, and J. L. Vázquez-Barquero. 2008. 'Cognitive functioning and negative symptoms in first episode schizophrenia: different patterns of correlates', *Neurotox Res*, 14: 227-35.
- Saleem, Majid M, Michael K Harte, Kay M Marshall, Andy Scally, Anita Brewin, and Jo C Neill. 2013. 'First episode psychosis patients show impaired cognitive function – a study of a South Asian population in the UK', 27: 366-73.
- Shin, Y. S., S. Y. Kim, T. Y. Lee, J. W. Hur, N. Y. Shin, S. N. Kim, M. S. Shin, and J. S. Kwon. 2016. 'Longitudinal change in neurocognition and its relation to symptomatic and functional changes over 2years in individuals at clinical high-risk for psychosis', *Schizophr Res*, 174: 50-57.
- Stouten, L. H., W. Veling, W. Laan, M. van der Helm, and M. van der Gaag. 2017. 'Psychosocial functioning in first-episode psychosis and associations with neurocognition, social cognition, psychotic and affective symptoms', *Early Interv Psychiatry*, 11: 23-36.
- Trampush, J. W., T. Lencz, P. DeRosse, M. John, J. A. Gallego, G. Petrides, Y. Hassoun, J. P. Zhang, J. Addington, C. H. Kellner, M. Tohen, K. E. Burdick, T. E. Goldberg, J. M. Kane, D. G. Robinson, and A. K. Malhotra. 2015. 'Relationship of Cognition to Clinical Response in First-Episode Schizophrenia Spectrum Disorders', *Schizophr Bull*, 41: 1237-47.
- Üçok, A., N. Direk, H. Kaya, N. Çağlar, U. Çıkıkcılı, H. Noyan, Ç Yokuşoğlu, and M. Devrim-Üçok. 2021. 'Relationship of negative symptom severity with cognitive symptoms and functioning in subjects at ultra-high risk for psychosis', *Early Interv Psychiatry*, 15: 966-74.
- Vargas, T., H. Snyder, M. Banich, R. Newberry, S. A. Shankman, G. P. Strauss, and V. A. Mittal. 2018. 'Altered selection during language processing in individuals at high risk for psychosis', *Schizophr Res*, 202: 303-09.
- Ventura, J., A. Ered, D. Gretchen-Doorly, K. L. Subotnik, W. P. Horan, G. S. Helleman, and K. H. Nuechterlein. 2015. 'Theory of mind in the early course of schizophrenia: stability, symptom and neurocognitive correlates, and relationship with functioning', *Psychol Med*, 45: 2031-43.
- Wong, S. C. Y., W. C. Chang, C. L. M. Hui, S. K. W. Chan, E. H. M. Lee, Y. N. Suen, and E. Y. H. Chen. 2021. 'Relationship of subjective quality of life with symptomatology, neurocognition and psychosocial functioning in first-episode psychosis: a structural equation modelling approach', *Eur Arch Psychiatry Clin Neurosci*, 271: 1561-69.
